# Supplementary material for: Interaction ofVeratrum nigrumwithPanax ginsengagainst Obesity: A Sang-ban Relationship
Source: Hindawi journal article supplement (doi:10.1155/2013/732126), 2013-01-01

## Result Description

The serum levels of ALT, AST, BUN, and creatinine were detected to check any possible internal toxicity in HF diet-induced obese C57BL/6J mice. The PG-VN group did not show any particular toxicity to the liver or kidney compared to the PG group or VN group.

## Figure Legend

SUPPLEMENTARY FIGURE 1: Effects of PG, VN, and their combinations on serum ALT, AST, BUN, and creatinine in HF diet-induced obese mice.

The serum levels of alanine transaminase (ALT) (a), aspartate transaminase (AST) (b), blood urea nitrogen (BUN) (c), and creatinine (d) were measured. All values are mean  $\pm$  SD. # $p < 0.05$ , significantly different from the Control; \* $p < 0.05$ , significantly different from the HF diet group. Con, Standard laboratory diet group; HFD, high-fat diet group; PG, HF diet plus PG group; VN, HF diet plus VN group; 1:1, HF diet plus PG-VN combination group; Slinti, HF diet plus slinti group. PG, *Panax ginseng*; VN, *Veratrum nigrum*.

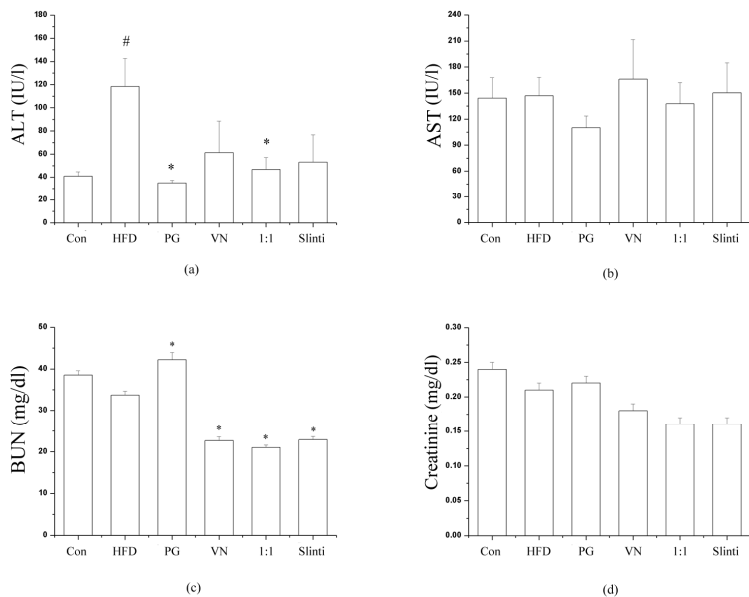

Supplement: f1 [file 732126.f1.pdf]
